# Supplementary material for: Epigenomic and transcriptomic analyses reveal differences between low-grade inflammation and severe exhaustion in LPS-challenged murine monocytes
Source: PubMed Central journal article supplement (PMC8799722; doi:10.1038/s42003-022-03035-2), 2022-01-28
Supplement: 42003_2022_3035_MOESM2_ESM.pdf [file 42003_2022_3035_MOESM2_ESM.pdf]

## **Description of Additional Supplementary Files**

**Supplementary Data 1:** Percentage of monocyte subpopulations in WT, *Tram*<sup>-/-</sup>, and *Irak-m*<sup>-/-</sup> in PBS, Low-dose and High-dose

**Supplementary Data 2:** Effect of LPS dosage on H3K27ac peak signal, peaks lost/gained, and peak localization

**Supplementary Data 3:** Clustered normalized H3K27ac at enhancers with linked genes and corresponding gene ontology

**Supplementary Data 4:** Differentially expressed genes between WT experimental conditions

**Supplementary Data 5:** Clustered RNA-seq counts of genes differentially expressed in WT and corresponding gene ontology

**Supplementary Data 6:** Clustered WT and TRAM<sup>-/-</sup> RNA-seq counts of genes differentially expressed in WT and corresponding gene ontology

**Supplementary Data 7:** Effect of IRF7 and IRF3 respectively on expression of S100A8 in WT and *Tram*<sup>-/-</sup>
